# Supplementary material
Source: PubMed Central journal article supplement (PMC5568065)

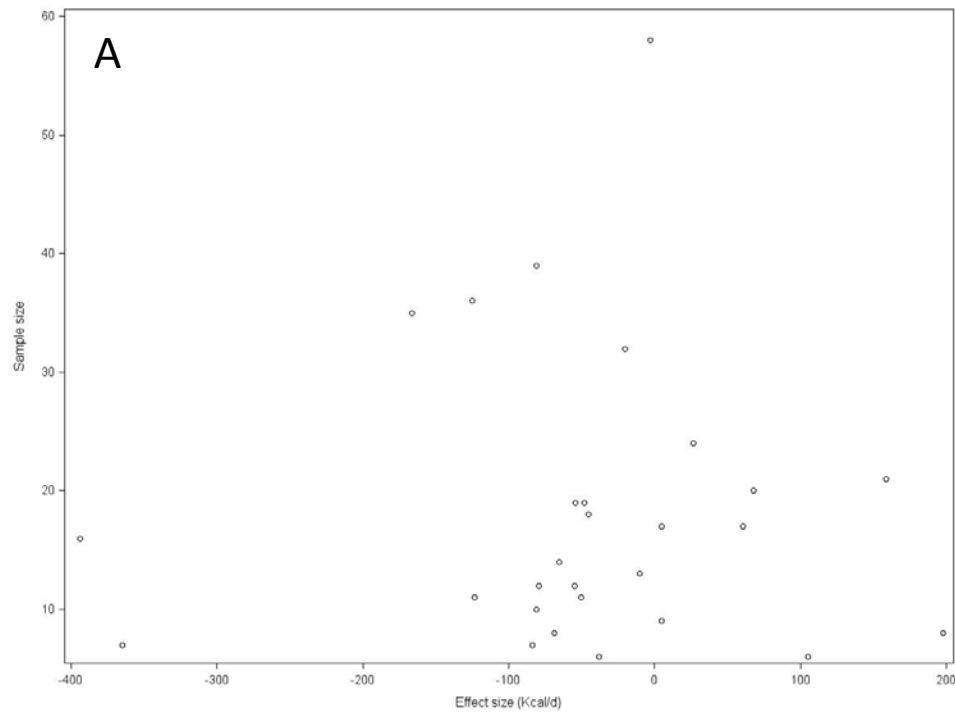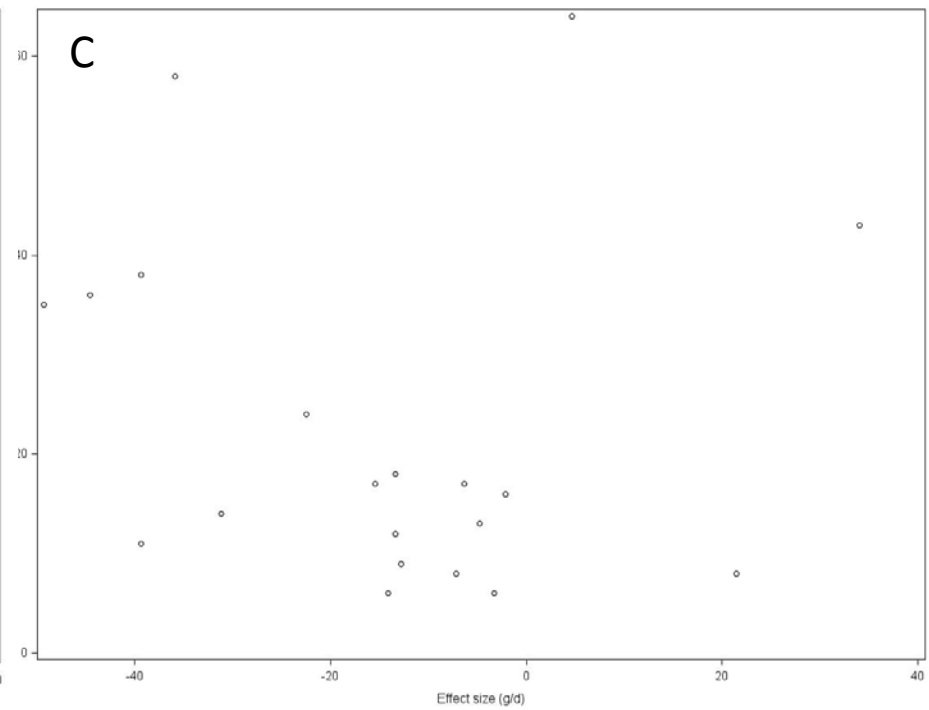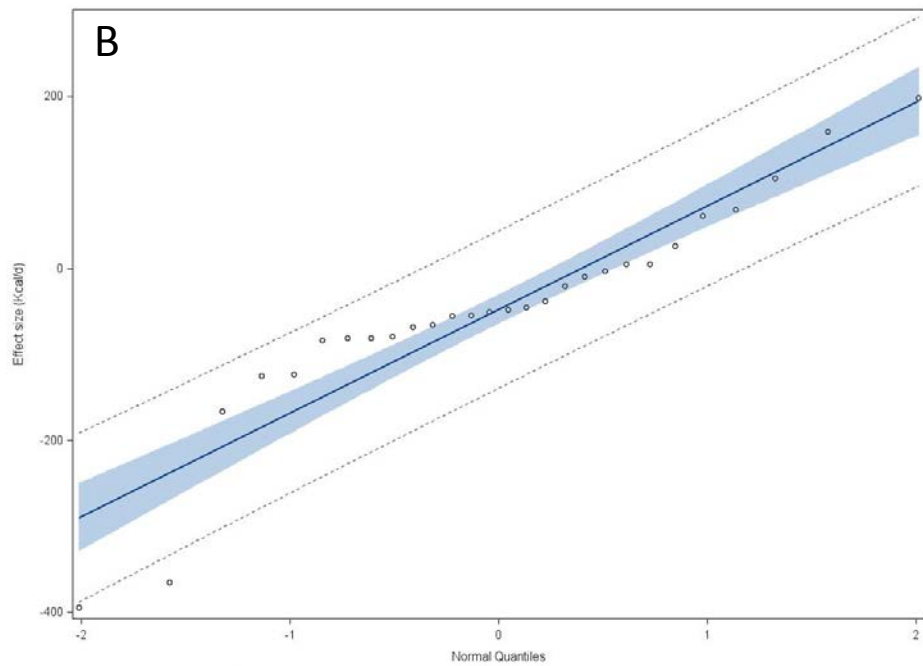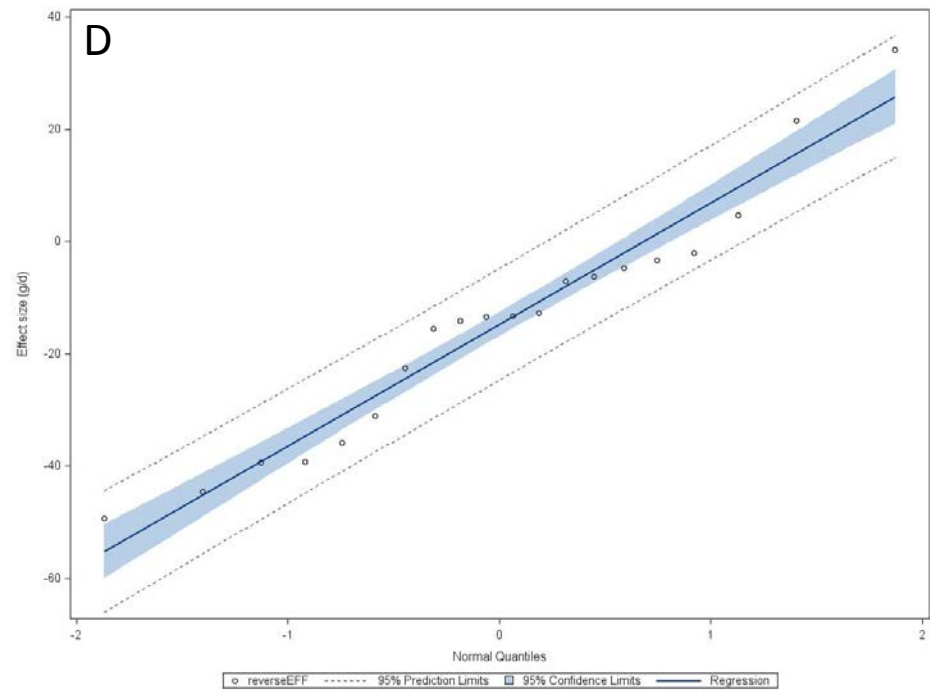

Supplement: NIHMS851543-supplement-1.pdf [file NIHMS851543-supplement-1.pdf]
